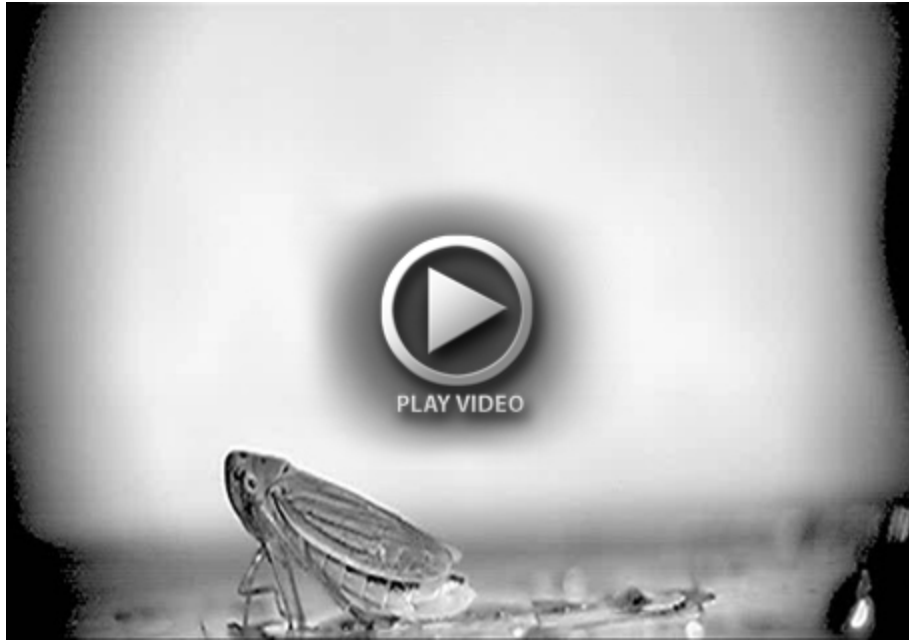

**Movie 1.** *Cicadella viridis*. The take-off phase of a jump viewed from the side.

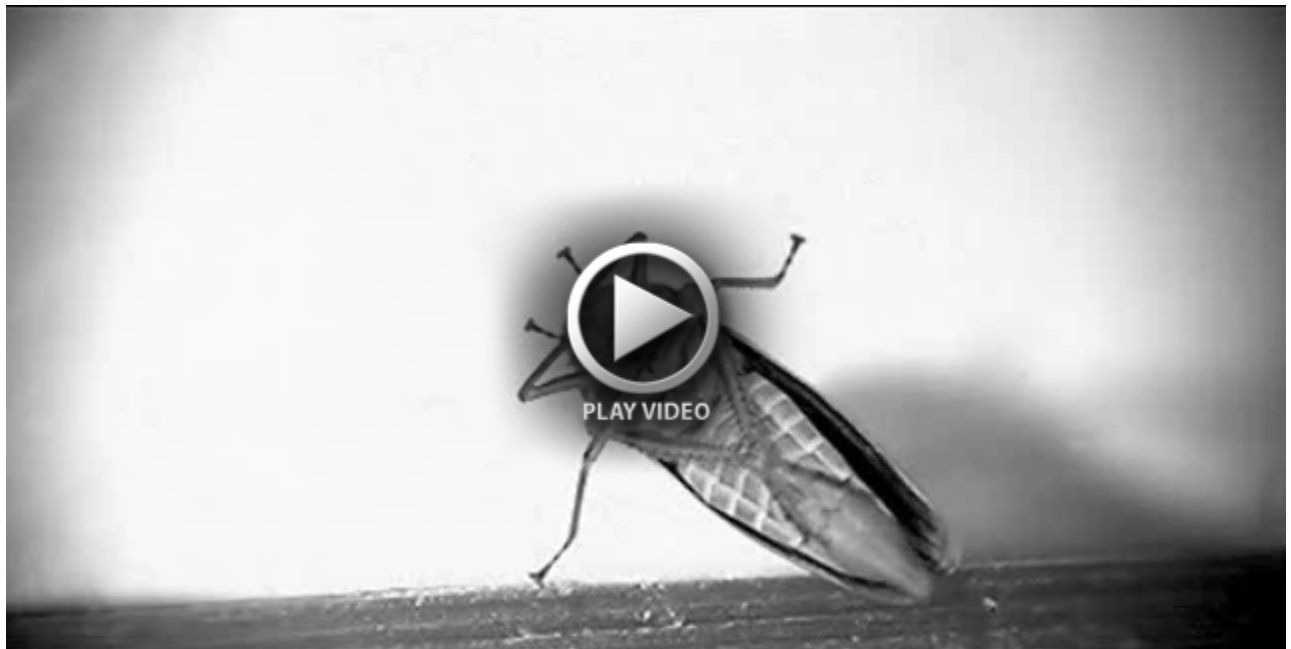

**Movie 2.** *Cicadella viridis*. The take-off phase of a jump viewed from below.
